# Supplementary material for: Higher methylation intensity induced by EBV LMP1 via NF-κB/DNMT3b signaling contributes to silencing of PTEN gene
Source: PubMed Central journal article supplement (PMC5129989; doi:10.18632/oncotarget.9474), 2016-05-19
Supplement: oncotarget-07-40025-s001.pdf [file oncotarget-07-40025-s001.pdf]

## Higher methylation intensity induced by EBV LMP1 via NF- $\kappa$ B/DNMT3b signaling contributes to silencing of PTEN gene

### SUPPLEMENTARY TABLES

Supplementary Table S1: PCR primer sequences for qRT-PCR and Methylated specific PCR Assay

| Primer                        | Sequence                        |
|-------------------------------|---------------------------------|
| qRT-PCR                       |                                 |
| LMP1-forward                  | 5' TGGAGCCGGCGACGGA 3'          |
| LMP1-reverse                  | 5' ACTGGGCCGTGGGGGTC 3'         |
| LMP2A-forward                 | 5' TGCAATTGCTAACATGGA 3'        |
| LMP2A-reverse                 | 5' GAGCACAAGCATCACCAGGA 3'      |
| EBNA1-forward                 | 5' ACCGAGGATGGAAATTGGGT 3'      |
| EBNA1-reverse                 | 5' CGCATCCTTCAAACCCTCAG 3'      |
| DNMT1-forward                 | 5' CCCCTGAGCCCTACCGAAT 3'       |
| DNMT1-reverse                 | 5' CTCGCTGGAGTGGACTTGTG 3'      |
| DNMT3a-forward                | 5' CCGATGCTGGGGACAAGAAT 3'      |
| DNMT3a-reverse                | 5' CCCGTCATCCACCAAGACAC 3'      |
| DNMT3b-forward                | 5' AGGGAAGACTCGATCCTCGTC 3'     |
| DNMT3b-reverse                | 5' GTGTGTAGCTTAGCAGACTGG 3'     |
| GAPDH-forward                 | 5' CATGGGGTGTGAACCATGAGA 3'     |
| GAPDH-reverse                 | 5' GTCTTCTGGGTGGCAGTGAT 3'      |
| PTEN-forward                  | 5' TGCAGAAGAAGCCCCGCCA 3'       |
| PTEN-reverse                  | 5' ACGCCTTCAAGTCTTTCTGCAGG 3'   |
| Methylated specific PCR Assay |                                 |
| Methylated                    |                                 |
| PTEN-forward                  | 5' TTCGTTGTCGTCGTCGTATT 3'      |
| PTEN-reverse                  | 5' GCCGCTTAACTCTAAACCGCAA 3'    |
| Unmethylated                  |                                 |
| PTEN-forward                  | 5' GTGTTGGTGGAGGTAGTTGTTT 3'    |
| PTEN-reverse                  | 5' ACCACTTAACTCTAAACCACAACCA 3' |
| ChIP PCR Assay                |                                 |
| DNMT3B-ChIP-forward           | 5' CTGGTTTTGGACGTCTGACC 3'      |
| DNMT3B-ChIP-reverse           | 5' GTGCCGACTCCCCTTGTAAG 3'      |
| NFKBIA-forward                | 5' GACGACCCCAATTCAAATCG 3'      |
| NFKBIA-reverse                | 5' TCAGGCTCGGGGAATTTCC 3'       |

**Supplementary Table S2: A list of antibodies used for Western blotting and IHC staining**

| <b>Name of antibody</b> | <b>Cat. No</b> | <b>Company</b> | <b>Mol weight</b> |
|-------------------------|----------------|----------------|-------------------|
| PTEN                    | ab32199        | Abcam          | 54 kDa            |
| NF-kB p65               | ab7970         | Abcam          | 65 kDa            |
| DNMT3b                  | ab13604        | Abcam          | 110 kDa           |
| GAPDH                   | P30008         | Abmart         | 37 kDa            |
| Lamin B                 | A2452          | ABclone        | 66 kDa            |
